# Supplementary material for: Using imaging to combat a pandemic: rationale for developing the UK National COVID-19 Chest Imaging Database
Source: PubMed Central journal article supplement — Eur Respir J. 2020 Aug 13;56(2):2001809. doi: 10.1183/13993003.01809-2020 (PMC7331656; doi:10.1183/13993003.01809-2020), 2020-08-13
Supplement: ERJ-01809-2020.Shareable.pdf [file ERJ-01809-2020.Shareable.pdf]

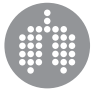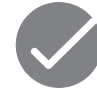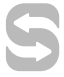

SHAREABLE PDF

# Using imaging to combat a pandemic: rationale for developing the UK National COVID-19 Chest Imaging Database

Joseph Jacob <sup>1,2</sup>, Daniel Alexander<sup>2</sup>, J. Kenneth Baillie <sup>3,4</sup>, Rosalind Berka<sup>5</sup>, Ottavia Bertolli<sup>5</sup>, James Blackwood<sup>6</sup>, Iain Buchan <sup>7</sup>, Claire Bloomfield<sup>8</sup>, Dominic Cushman<sup>9</sup>, Annemarie Docherty<sup>10</sup>, Anthony Edey<sup>11</sup>, Alberto Favaro<sup>5</sup>, Fergus Gleeson<sup>8,12</sup>, Mark Halling-Brown<sup>13,14</sup>, Samanjit Hare<sup>15</sup>, Emily Jefferson<sup>16,17</sup>, Annette Johnstone<sup>18</sup>, Myles Kirby<sup>5</sup>, Ruth McStay<sup>19</sup>, Arjun Nair<sup>20</sup>, Peter J.M. Openshaw<sup>21</sup>, Geoff Parker<sup>2,22</sup>, Gerry Reilly<sup>16</sup>, Graham Robinson<sup>23</sup>, Giles Roditi<sup>24</sup>, Jonathan C.L. Rodrigues<sup>23</sup>, Neil Sebire <sup>16</sup>, Malcolm G. Semple<sup>25</sup>, Catherine Sudlow<sup>26,27</sup>, Nick Woznitza <sup>28,29,30</sup> and Indra Joshi<sup>9</sup>

**Affiliations:** <sup>1</sup>Dept of Respiratory Medicine, University College London, London, UK. <sup>2</sup>Centre for Medical Image Computing, Dept of Computer Science, University College London, London, UK. <sup>3</sup>Division of Genetics and Genomics, The Roslin Institute, University of Edinburgh, Edinburgh, UK. <sup>4</sup>Centre for Inflammation Research, University of Edinburgh, Edinburgh, UK. <sup>5</sup>Faculty, London, UK. <sup>6</sup>The Industrial Centre for Artificial Intelligence Research in Digital Diagnostics (iCAIRD), Dept of eHealth, NHS Greater Glasgow and Clyde, Glasgow, UK. <sup>7</sup>Institute of Population Health, University of Liverpool, Liverpool, UK. <sup>8</sup>National Consortium of Intelligent Medical Imaging (NCIMI), The University of Oxford, Big Data Institute, Oxford, UK. <sup>9</sup>NHSX, London, UK. <sup>10</sup>Centre for Medical Informatics, Usher Institute, University of Edinburgh, Edinburgh, UK. <sup>11</sup>Dept of Radiology, Southmead Hospital, North Bristol NHS Trust, Bristol, UK. <sup>12</sup>Dept of Oncology, University of Oxford, Oxford, UK. <sup>13</sup>Scientific Computing, Royal Surrey NHS Foundation Trust, Guildford, UK. <sup>14</sup>Centre for Vision, Speech and Signal Processing (CVSSP), University of Surrey, Guildford, UK. <sup>15</sup>Dept of Radiology, Royal Free London NHS Trust, London, UK. <sup>16</sup>Health Data Research UK, London, UK. <sup>17</sup>Health Informatics Centre (HIC), School of Medicine, University of Dundee, Dundee, UK. <sup>18</sup>Dept of Radiology, Leeds Teaching Hospitals NHS Trust, Leeds General Infirmary, Leeds, UK. <sup>19</sup>Dept of Radiology, Freeman Hospital, Newcastle upon Tyne Hospitals NHS Foundation Trust, Newcastle upon Tyne, UK. <sup>20</sup>Dept of Radiology, University College London Hospital, London, UK. <sup>21</sup>National Heart and Lung Institute, Faculty of Medicine, Imperial College London, London, UK. <sup>22</sup>Bioxydyn Limited, Manchester, UK. <sup>23</sup>Dept of Radiology, Royal United Hospitals Bath NHS Foundation Trust, Bath, UK. <sup>24</sup>Dept of Radiology, University of Glasgow, Glasgow Royal Infirmary, Glasgow, UK. <sup>25</sup>NIHR Health Protection Research Unit in Emerging and Zoonotic Infections, Faculty of Health and Life Sciences, University of Liverpool, Liverpool, UK. <sup>26</sup>Usher Institute, University of Edinburgh, Edinburgh, UK. <sup>27</sup>British Heart Foundation (BHF) Data Science Centre, Health Data Research UK, Edinburgh, UK. <sup>28</sup>Radiology Dept, Homerton University Hospital, London, UK. <sup>29</sup>School of Allied and Public Health Professions, Canterbury Christ Church University, Canterbury, UK. <sup>30</sup>12 NHS Nightingale Hospital London, London, UK.

**Correspondence:** Joseph Jacob, Centre for Medical Image Computing, 1st Floor, 90 High Holborn, London, WC1V 6LJ, UK. E-mail: j.jacob@ucl.ac.uk

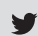

@ERSpublications

The National COVID-19 Chest Imaging Database (NCCID) is a repository of chest radiographs, CT and MRI images and clinical data from COVID-19 patients across the UK, to support research and development of AI technology and give insight into COVID-19 disease <https://bit.ly/3eQueuha>

**Cite this article as:** Jacob J, Alexander D, Baillie JK, *et al.* Using imaging to combat a pandemic: rationale for developing the UK National COVID-19 Chest Imaging Database. *Eur Respir J* 2020; 56: 2001809 [<https://doi.org/10.1183/13993003.01809-2020>].

This single-page version can be shared freely online.

Since the emergence of the novel coronavirus, severe acute respiratory syndrome coronavirus 2 (SARS-CoV-2), in Wuhan, China in 2019 [1], the resulting coronavirus disease 2019 (COVID-19) disease has rapidly transitioned into a global pandemic with over 31 000 deaths and 215 000 infections in the UK as of 10 May 2020 [2]. Confirmation of SARS-CoV-2 infection requires reverse transcriptase PCR (RT-PCR) testing [3]. Chest radiographic and/or computed tomography (CT) imaging is also central to diagnosis and management [4].
